# Supplementary material for: Acyclic forms of aldohexoses and ketohexoses in aqueous and DMSO solutions: conformational features studied using molecular dynamics simulations
Source: Royal Society of Chemistry journal article supplement (doi:10.1039/c6cp00809g), 2016-01-01
Supplement: c6cp00809g1.pdf [file c6cp00809g1.pdf]

## Supporting Information

# **Acyclic forms of aldohexoses and ketohexoses in aqueous and DMSO solutions: conformational features studied by molecular dynamics simulations**

Wojciech Plazinski<sup>1,+</sup>, Anita Plazinska<sup>2</sup>, Mateusz Drach<sup>3</sup>

<sup>1</sup> *Institute of Catalysis and Surface Chemistry, Polish Academy of Sciences,  
ul. Niezapominajek 8, 30-239 Cracow, Poland*

<sup>2</sup> *Department of Biopharmacy, Faculty of Pharmacy, Medical University of Lublin,  
W. Chodzki Str., 4a, 20-093 Lublin, Poland*

<sup>3</sup> *Department of Theoretical Chemistry, Faculty of Chemistry, UMCS,  
pl. M. Curie-Skłodowskiej 3, 20-031 Lublin, Poland*

---

<sup>+</sup> Corresponding author. Tel.: +48815375685; fax: +48815375685.  
E-mail addresses: wojtek\_plazinski@o2.pl; wojtek@vega.umcs.lublin.pl

**Tab. S1.** The  $\Delta F_{P-F}$  values (in [kJ/mol]) calculated for the studied compounds in the presence of explicit solvent (water or DMSO). Due to large degree of arbitrariness in the definition of the  $P$  and  $F$  regions (see *Methods* section in the main manuscript), several different combinations of the  $a$  and  $b$  values (in [nm]) are considered.

|             | water                    |                         |                           | DMSO                     |                         |                           |
|-------------|--------------------------|-------------------------|---------------------------|--------------------------|-------------------------|---------------------------|
|             | $a = 0.25,$<br>$b = 0.3$ | $a = 0.3,$<br>$b = 0.2$ | $a = 0.35,$<br>$b = 0.35$ | $a = 0.25,$<br>$b = 0.3$ | $a = 0.3,$<br>$b = 0.2$ | $a = 0.35,$<br>$b = 0.35$ |
| aldohexoses |                          |                         |                           |                          |                         |                           |
| D-All       | 30.8                     | 36.4                    | 18.0                      | 33.7                     | 39.1                    | 19.8                      |
| D-Alt       | 29.5                     | 29.2                    | 17.5                      | 30.9                     | 27.5                    | 18.2                      |
| D-Glc       | 30.6                     | 36.8                    | 17.7                      | 32.7                     | 42.4                    | 20.9                      |
| D-Man       | 29.5                     | 34.3                    | 16.1                      | 29.5                     | 28.6                    | 18.5                      |
| D-Gul       | 30.8                     | 36.2                    | 17.8                      | 25.8                     | 30.3                    | 14.6                      |
| D-Ido       | 28.2                     | 43.8                    | 13.5                      | 30.4                     | 45.7                    | 16.3                      |
| D-Gal       | 29.1                     | 37.9                    | 15.6                      | 28.9                     | 30.3                    | 15.6                      |
| D-Tal       | 30.7                     | 36.1                    | 17.9                      | 30.6                     | 39.9                    | 16.4                      |
| ketohexoses |                          |                         |                           |                          |                         |                           |
| D-Fru       | 28.4                     | 32.4                    | 17.9                      | 25.5                     | 30.7                    | 19.1                      |
| D-Psi       | 27.5                     | 36.4                    | 16.7                      | 22.8                     | 28.1                    | 18.3                      |
| D-Sor       | 27.4                     | 36.8                    | 16.3                      | 25.8                     | 35.5                    | 19.7                      |
| L-Sor       | 27.2                     | 36.7                    | 16.4                      | 25.7                     | 33.1                    | 19.0                      |
| D-Tag       | 26.7                     | 32.3                    | 16.8                      | 25.0                     | 24.4                    | 18.4                      |

**Tab. S2.** The occurrences (in [number of HBs/timeframe]) of intramolecular hydrogen bonds and their estimated lifetimes. The data correspond to the unbiased MD simulations of aldo- and ketohexoses in explicit water. The 'pyranose' and 'furanose' labels correspond to HBs between aldehyde or ketone moieties with the hydroxyl groups that may hypothetically contribute in the formation of pyranose and furanose rings, respectively.

|             | pyranose   |               | furanose   |               | total      |               |
|-------------|------------|---------------|------------|---------------|------------|---------------|
|             | occurrence | lifetime [ps] | occurrence | lifetime [ps] | occurrence | lifetime [ps] |
| D-All       | 0          | -             | 0.001      | 6.53          | 1.44       | 187           |
| D-Alt       | 0          | -             | 0          | -             | 1.02       | 390           |
| D-Glc       | 0          | -             | 0.002      | 7.8           | 0.92       | 1101          |
| D-Man       | 0          | -             | 0          | -             | 0.52       | 302           |
| D-Gul       | 0          | -             | 0          | -             | 0.50       | 599           |
| D-Ido       | 0          | -             | 0.002      | 6.6           | 0.56       | 458           |
| D-Gal       | 0          | -             | 0          | -             | 0.27       | 1759          |
| D-Tal       | 0          | -             | 0          | -             | 0.73       | 361           |
| ketohexoses |            |               |            |               |            |               |
| D-Fru       | 0          | -             | 0          | -             | 0.36       | 153           |
| D-Psi       | 0          | -             | 0.001      | 7.7           | 0.57       | 415           |
| D-Sor       | 0          | -             | 0.01       | 218           | 0.57       | 548           |
| L-Sor       | 0          | -             | 0.000      | 134           | 0.57       | 512           |
| D-Tag       | 0          | -             | 0.001      | 7.6           | 0.21       | 5532          |

**Tab. S3.** The occurrences (in [number of HBs/timeframe]) of intramolecular hydrogen bonds and their estimated lifetimes. The data correspond to the unbiased MD simulations of aldo- and ketohexoses in explicit DMSO solvent. Other details as in Tab. S1.

|             | pyranose   |                  | furanose   |                  | total      |                  |
|-------------|------------|------------------|------------|------------------|------------|------------------|
|             | occurrence | lifetime<br>[ps] | occurrence | lifetime<br>[ps] | occurrence | lifetime<br>[ps] |
| D-All       | 0          | -                | 0          | -                | 2.18       | 220              |
| D-Alt       | 0          | -                | 0          | -                | 1.61       | 411              |
| D-Glc       | 0          | -                | 0.002      | 18.0             | 1.46       | 1382             |
| D-Man       | 0          | -                | 0          | -                | 1.16       | 652              |
| D-Gul       | 0          | -                | 0.001      | 7.4              | 0.82       | 705              |
| D-Ido       | 0          | -                | 0.003      | 16.5             | 1.17       | 910              |
| D-Gal       | 0          | -                | 0          | -                | 1.06       | 1124             |
| D-Tal       | 0          | -                | 0          | -                | 1.16       | 404              |
| ketohexoses |            |                  |            |                  |            |                  |
| D-Fru       | 0          | -                | 0.001      | 16.6             | 0.91       | 305              |
| D-Psi       | 0          | -                | 0.001      | 14.6             | 0.68       | 1034             |
| D-Sor       | 0          | -                | 0.017      | 533.4            | 0.91       | 290              |
| L-Sor       | 0          | -                | 0.016      | 543.4            | 0.89       | 337              |
| D-Tag       | 0          | -                | 0.002      | 156.0            | 0.64       | 2180             |

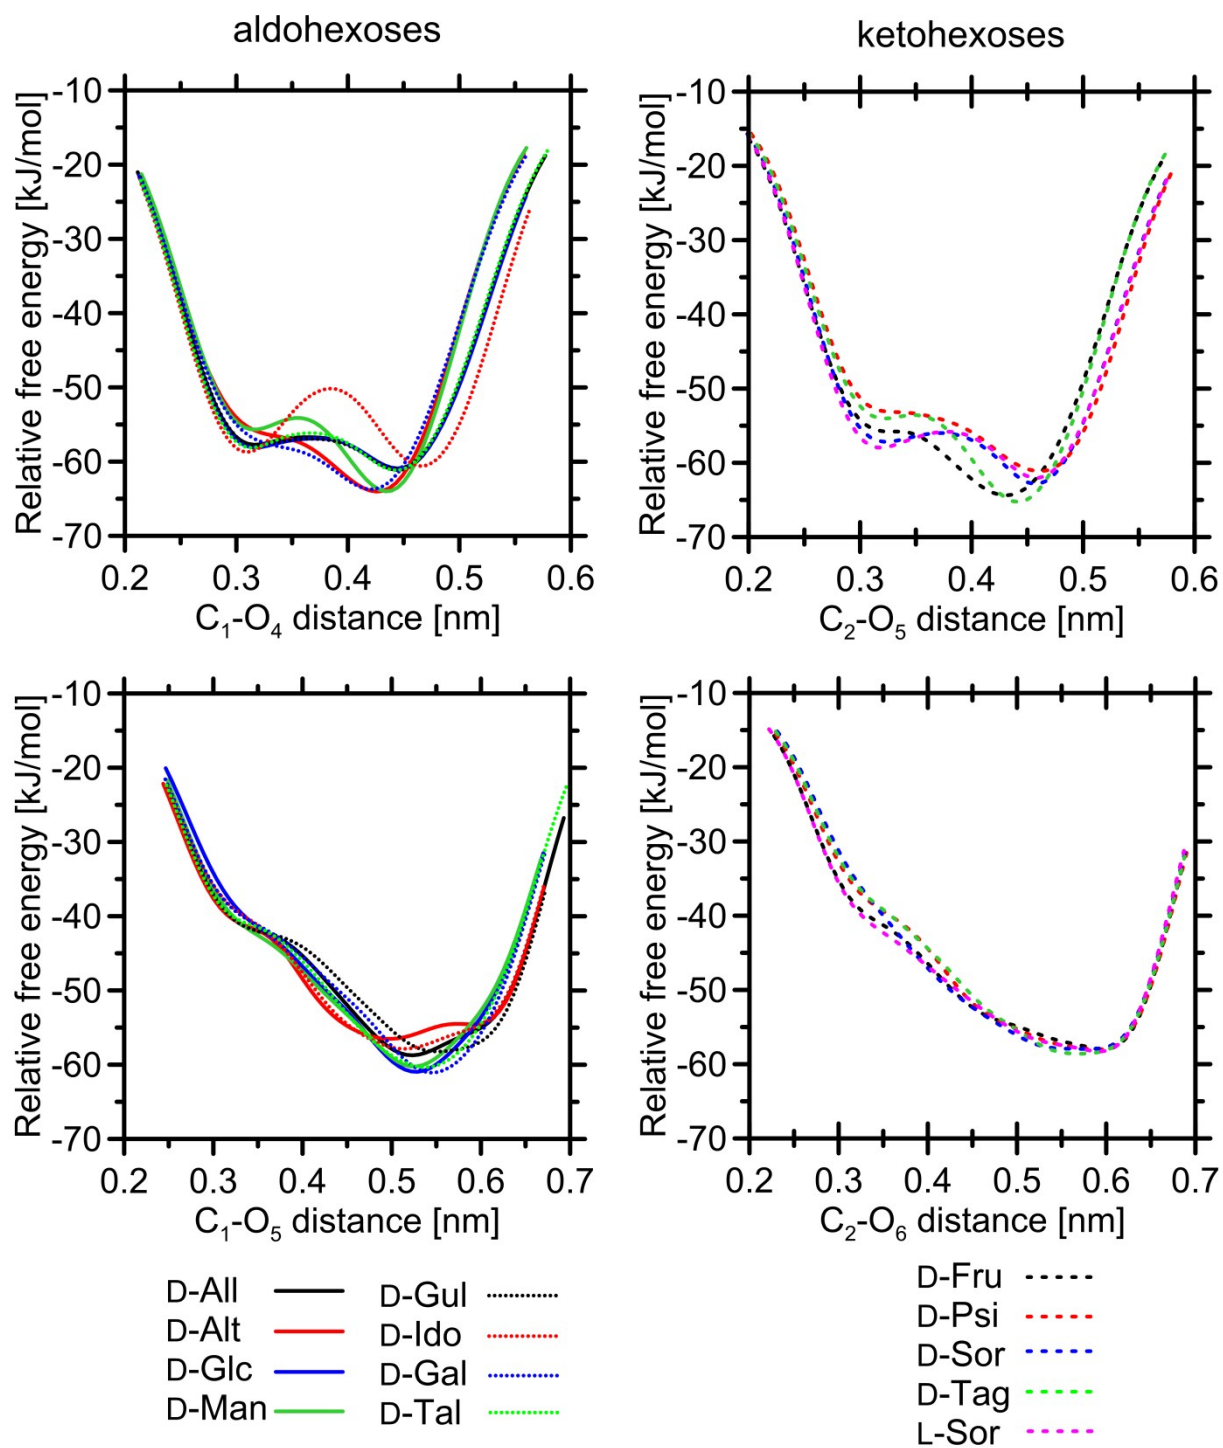

**Fig. S1.** One dimensional free energy profiles calculated for the selected interatomic distances of aldo- (left panels) and ketohexose (right panels) molecules. All plots correspond to the enhanced-sampling MD simulations in the explicit water solvent. See the main manuscript for details.

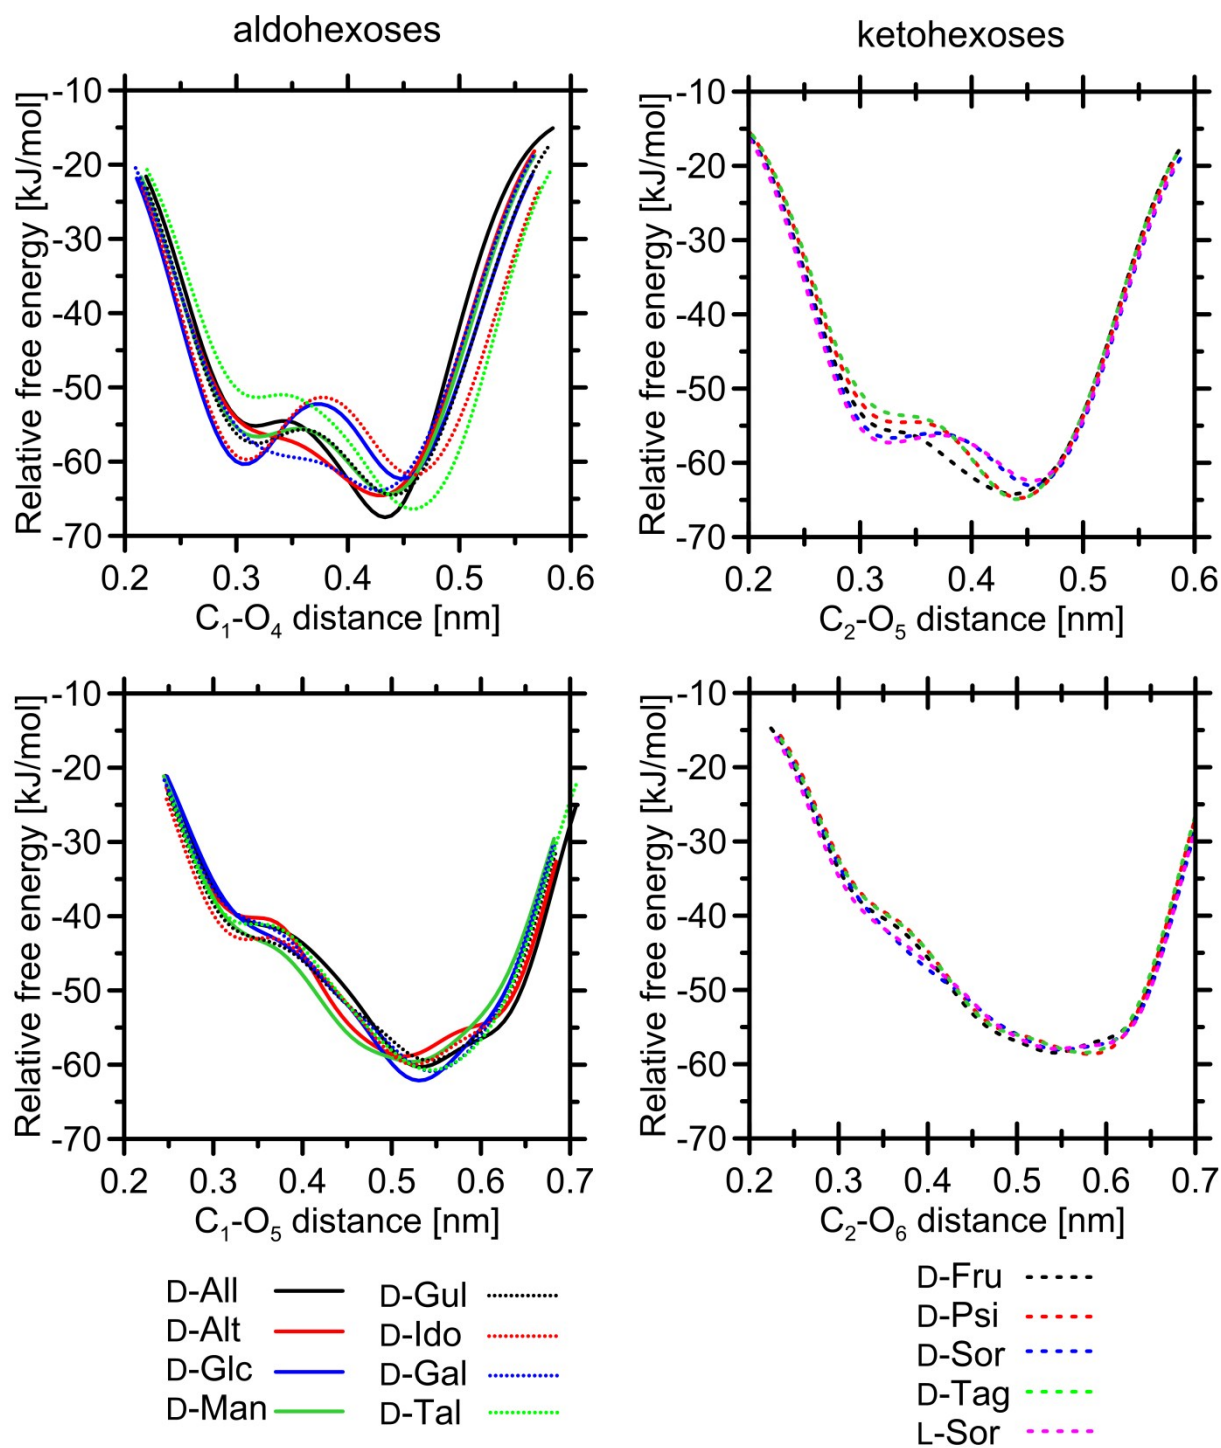

**Fig. S2.** One dimensional free energy profiles calculated for the selected interatomic distances of aldo- (left panels) and ketohexose (right panels) molecules. All plots correspond to the enhanced-sampling MD simulations in the explicit DMSO solvent. See the main manuscript for details.

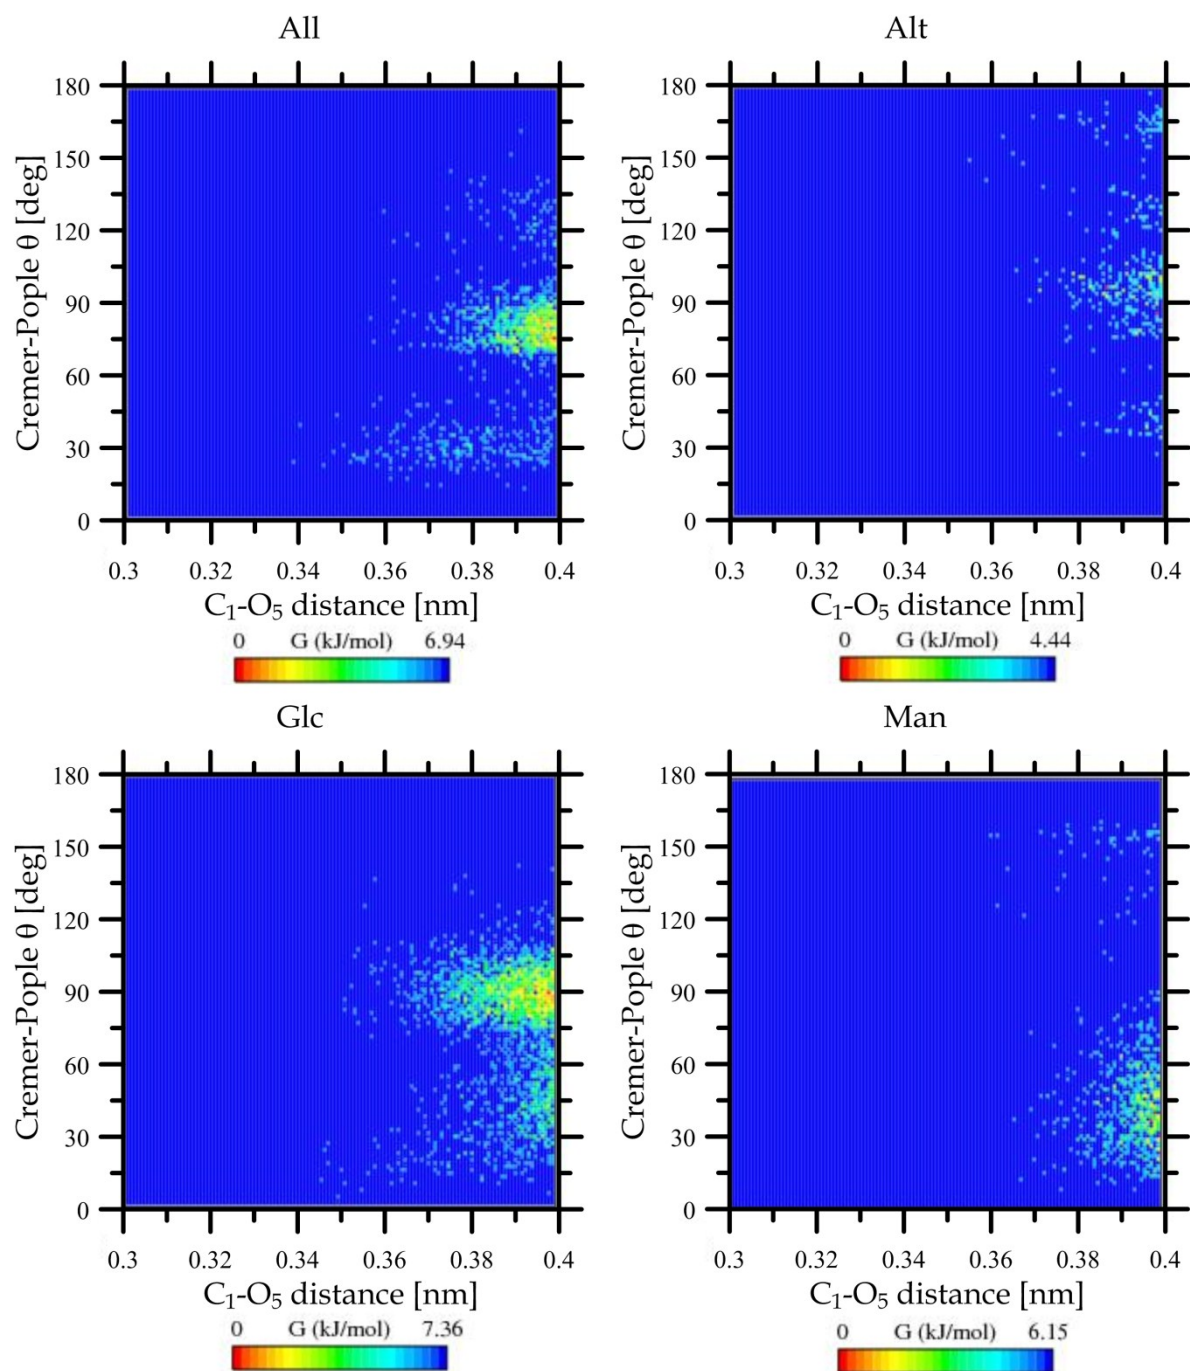

**Fig. S3.** Two dimensional  $\theta$  vs.  $d_1$  free energy maps calculated for four aldohexoses of the D-series (All, Alt, Glc and Man).  $\theta$  is the Cremer-Pople parameter describing the geometry of the ring created by the following six atoms:  $C_1$ ,  $C_2$ ,  $C_3$ ,  $C_4$ ,  $C_5$  and  $O_5$  whereas  $d_1$  is the interatomic  $O_5$ - $C_1$  distance. All plots correspond to the unbiased MD simulations in the explicit water solvent. See the main manuscript for details.

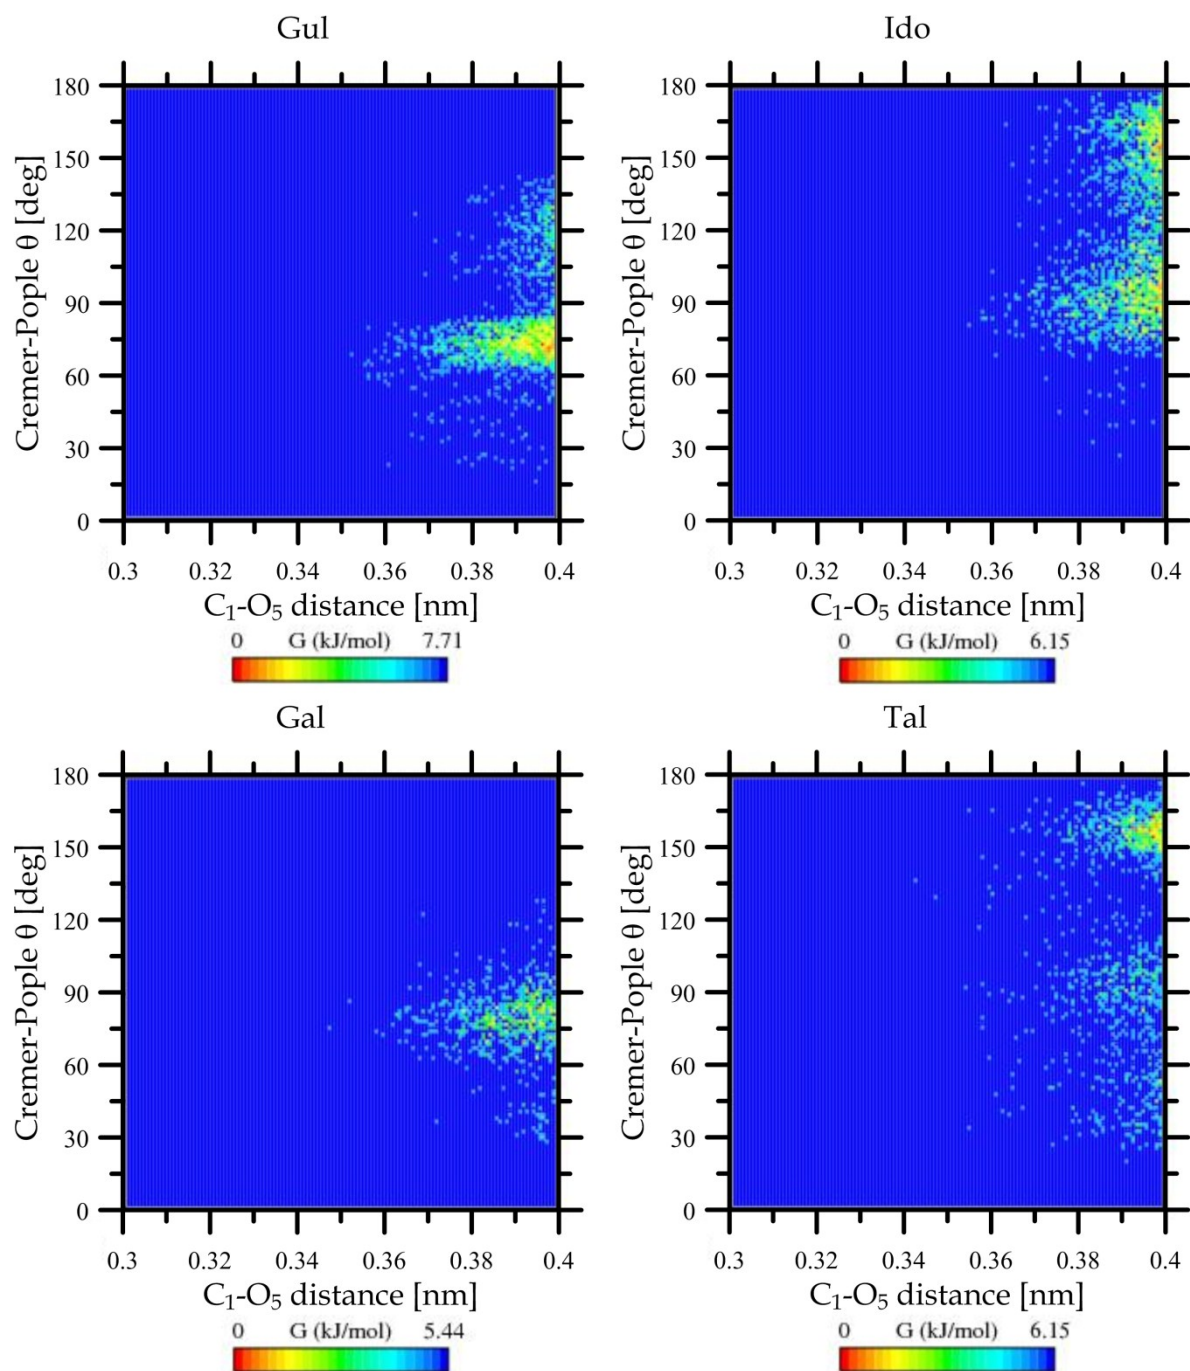

**Fig. S4.** Two dimensional  $\theta$  vs.  $d_1$  free energy maps calculated for four aldohexoses of the D-series (Gul, Ido, Gal and Tal).  $\theta$  is the Cremer-Pople parameter describing the geometry of the ring created by the following six atoms:  $C_1$ ,  $C_2$ ,  $C_3$ ,  $C_4$ ,  $C_5$  and  $O_5$  whereas  $d_1$  is the interatomic  $O_5-C_1$  distance. All plots correspond to the unbiased MD simulations in the explicit water solvent. See the main manuscript for details.
